# Supplementary material
Source: PubMed Central journal article supplement (PMC1857323)

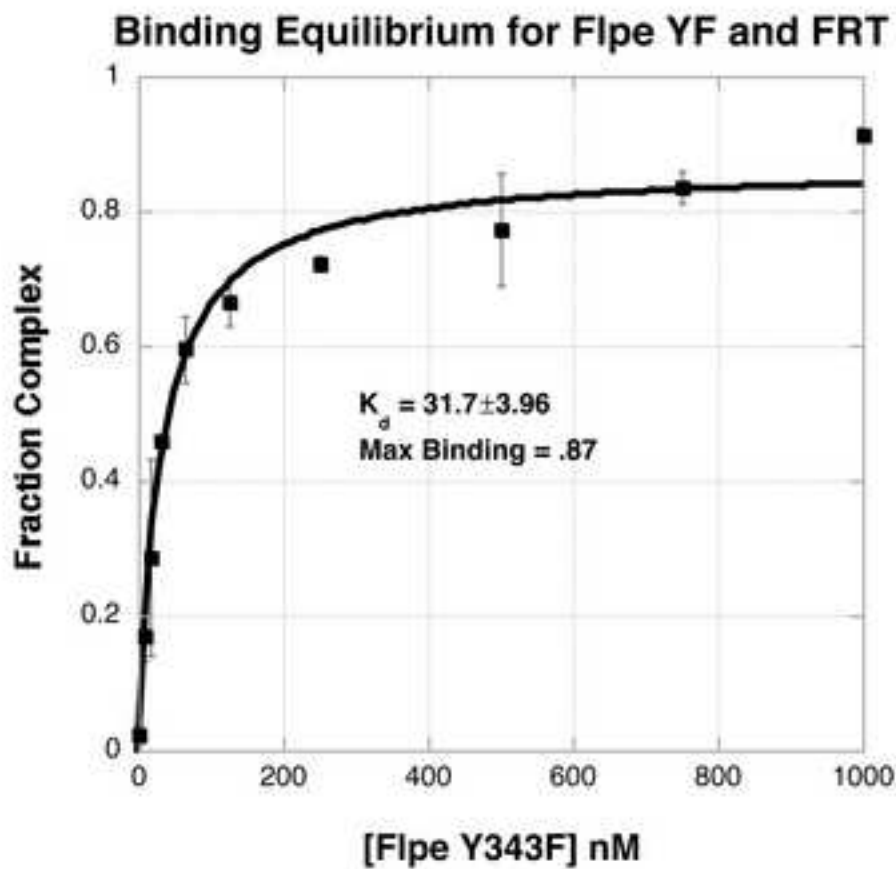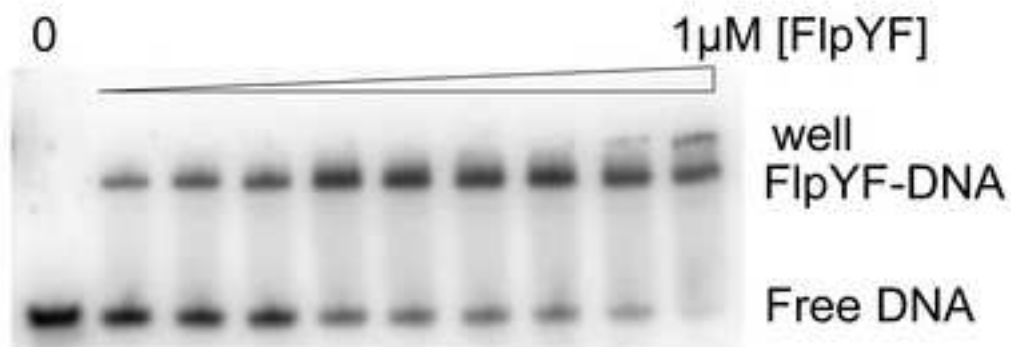

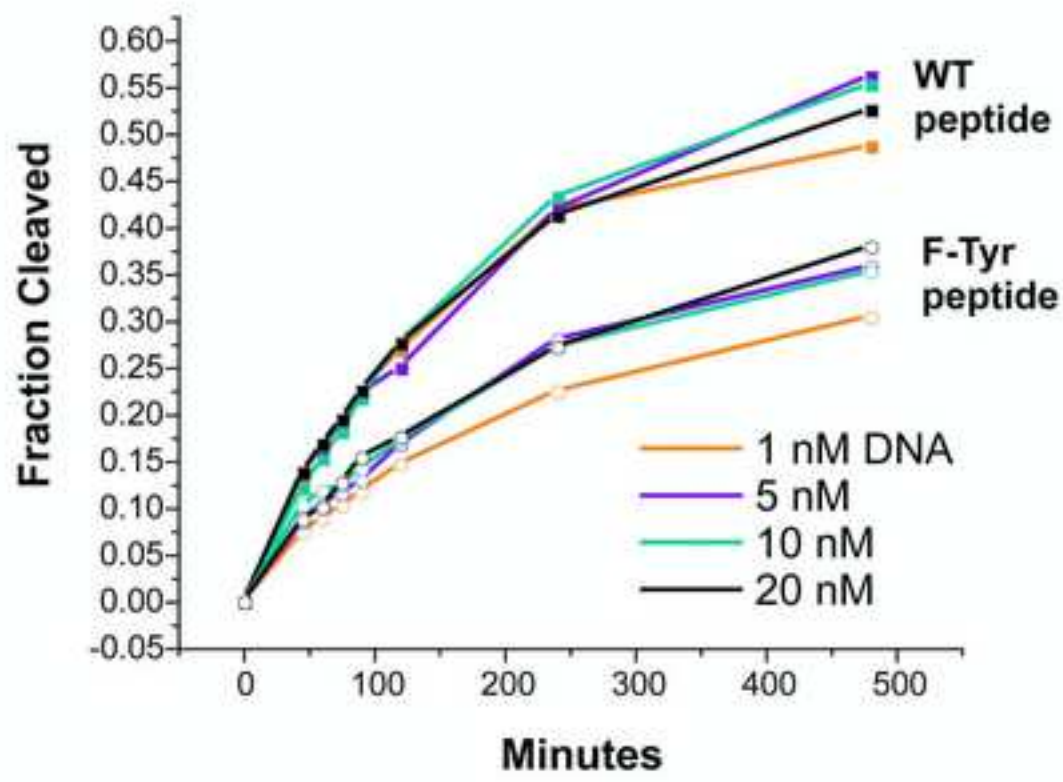

Figure S2

Figure S3

[Click here to download high resolution image](#)

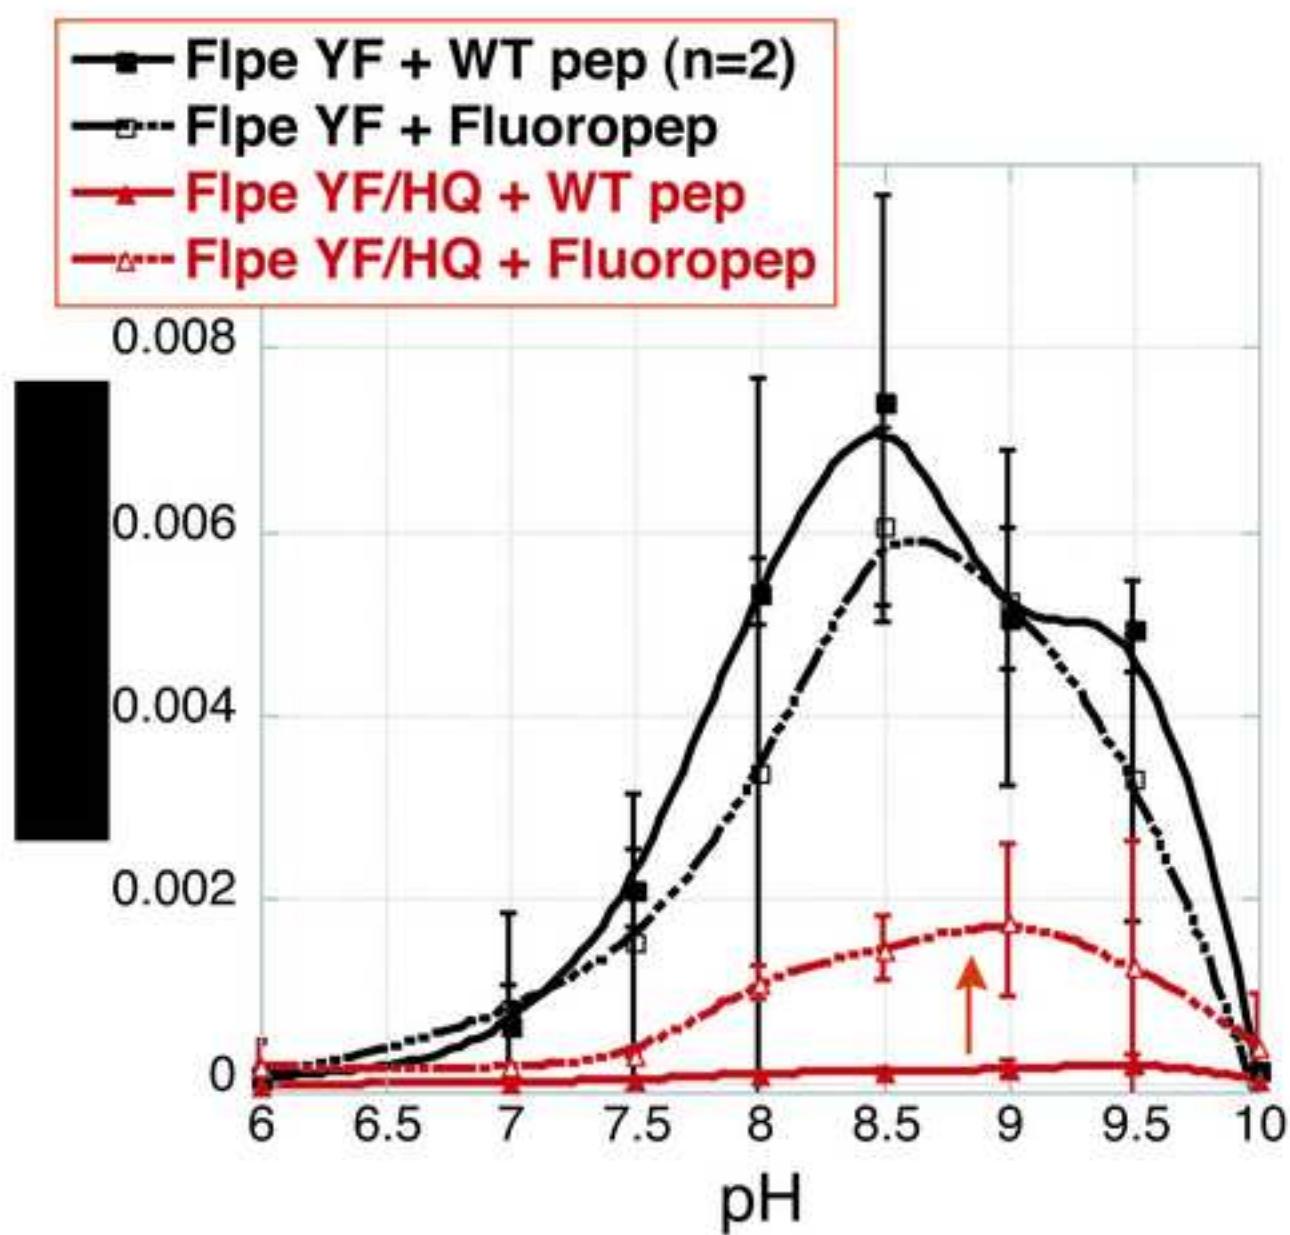

Supplement: NIHMS19198-supplement-01.pdf [file NIHMS19198-supplement-01.pdf]
